# Supplementary material for: Systematic identification of latent disease-gene associations from PubMed articles
Source: PLoS One. 2018 Jan 26;13(1):e0191568. doi: 10.1371/journal.pone.0191568 (PMC5786305; doi:10.1371/journal.pone.0191568)
Supplement: S5 File — (XLSX) [file pone.0191568.s009.xlsx]

## Sheet: Sheet1
Ingenuity Canonical Pathways	-log(p-value)	Ratio	Molecules
Huntington's Disease Signaling	8.95	0.0607	BDNF,CREBBP,TBP,NGF,TGM2,HDAC6,GRM5,AKT1,HDAC3,ATP5B,KL,HTT,DLG4,DCTN1,SNCA
G-Protein Coupled Receptor Signaling	6.5	0.0468	GRM5,HTR2C,FYN,AKT1,GRK2,KL,CREBBP,PRKAR1B,HTR1A,DRD3,DRD2,ADORA2A,HTR2A
Neuropathic Pain Signaling In Dorsal Horn Neurons	5.37	0.0678	GRM5,NTRK2,GPR37,BDNF,KL,GRIN2D,PRKAR1B,ELK1
Parkinson's Signaling	5.21	0.25	GPR37,PARK7,PARK2,SNCA
Mitochondrial Dysfunction	4.74	0.0479	SOD2,ATP5B,PARK7,LRRK2,HTRA2,PARK2,SNCA,APP,PINK1
Neurotrophin/TRK Signaling	4.37	0.0741	AKT1,NTRK2,BDNF,KL,CREBBP,NGF
PEDF Signaling	4.28	0.0714	SOD2,AKT1,BDNF,KL,NGF,ELK1
Serotonin Receptor Signaling	4.23	0.0943	HTR2C,GCH1,SLC6A4,HTR1A,HTR2A
Dopamine Receptor Signaling	4.09	0.0659	GCH1,COMT,PRKAR1B,DRD3,DRD2,SLC6A3
Reelin Signaling in Neurons	4.06	0.0652	FYN,APOE,AKT1,KL,MAPT,APP
CREB Signaling in Neurons	3.85	0.0417	GRM5,AKT1,KL,GRIN2D,CREBBP,PRKAR1B,TBP,ELK1
NRF2-mediated Oxidative Stress Response	3.84	0.0415	AKR7A2,SOD2,AKT1,KL,DNAJC6,CREBBP,DNAJC13,SOD1
Glutamate Receptor Signaling	3.83	0.0781	GRM5,SLC17A7,SLC17A6,GRIN2D,DLG4
Human Embryonic Stem Cell Pluripotency	3.77	0.0473	AKT1,WNT7A,NTRK2,BDNF,KL,NGF,WNT2
IGF-1 Signaling	3.68	0.0556	IGFBP6,AKT1,KL,FOXO3,PRKAR1B,ELK1
PXR/RXR Activation	3.65	0.0714	CYP1A2,AKT1,FOXO3,PRKAR1B,CYP2C19
Gαq Signaling	3.43	0.0417	GRM5,HTR2C,AKT1,GRK2,KL,ELK1,HTR2A
Corticotropin Releasing Hormone Signaling	3.41	0.0496	BDNF,CREBBP,PRKAR1B,NR4A1,NOS2,ELK1
Neuroprotective Role of THOP1 in Alzheimer's Disease	3.34	0.087	PDYN,MAPT,PRKAR1B,APP
Dopamine-DARPP32 Feedback in cAMP Signaling	3.31	0.0398	GRIN2D,CREBBP,PRKAR1B,PAWR,KCNJ6,DRD3,DRD2
Glucocorticoid Receptor Signaling	3.28	0.0307	AKT1,CCL13,KL,SUMO1,FOXO3,CREBBP,TBP,NOS2,ELK1
FLT3 Signaling in Hematopoietic Progenitor Cells	3.26	0.0588	STAT4,AKT1,KL,CREBBP,ELK1
Amyloid Processing	3.13	0.0769	AKT1,MAPT,PRKAR1B,APP
Colorectal Cancer Metastasis Signaling	3.06	0.0317	TLR4,AKT1,WNT7A,GRK2,KL,PRKAR1B,NOS2,WNT2
IL-12 Signaling and Production in Macrophages	2.92	0.04	STAT4,TLR4,APOE,AKT1,KL,NOS2
Bupropion Degradation	2.92	0.111	CYP1A2,CYP2D6,CYP2C19
CDK5 Signaling	2.88	0.0485	NTRK2,BDNF,MAPT,PRKAR1B,NGF
ERK5 Signaling	2.79	0.0625	AKT1,FOXO3,CREBBP,NGF
Hypoxia Signaling in the Cardiovascular System	2.77	0.0615	AKT1,COPS5,SUMO1,CREBBP
Endometrial Cancer Signaling	2.75	0.0606	AKT1,KL,FOXO3,ELK1
Acetone Degradation I (to Methylglyoxal)	2.7	0.0938	CYP1A2,CYP2D6,CYP2C19
cAMP-mediated signaling	2.69	0.0311	GRK2,CREBBP,PRKAR1B,HTR1A,DRD3,DRD2,ADORA2A
HIF1α Signaling	2.64	0.0427	AKT1,KL,COPS5,CREBBP,NOS2
Superoxide Radicals Degradation	2.58	0.2	SOD2,SOD1
NGF Signaling	2.54	0.0407	AKT1,KL,CREBBP,NGF,ELK1
NF-κB Signaling	2.52	0.0333	TLR4,AKT1,NTRK2,KL,CREBBP,NGF
Gap Junction Signaling	2.51	0.0331	HTR2C,AKT1,KL,PRKAR1B,DRD2,HTR2A
Axonal Guidance Signaling	2.5	0.022	FYN,AKT1,WNT7A,NTRK2,BDNF,KL,COPS5,PRKAR1B,NGF,WNT2
Estrogen-Dependent Breast Cancer Signaling	2.42	0.0494	AKT1,KL,CREBBP,ELK1
14-3-3-mediated Signaling	2.41	0.0379	AKT1,KL,MAPT,ELK1,SNCA
PI3K Signaling in B Lymphocytes	2.4	0.0376	TLR4,FYN,AKT1,FOXO3,ELK1
Dendritic Cell Maturation	2.4	0.0314	STAT4,TLR4,AKT1,KL,CREBBP,HLA-DRB5
Thyroid Cancer Signaling	2.39	0.0732	NTRK2,BDNF,NGF
IL-17 Signaling	2.35	0.0471	AKT1,KL,NOS2,ELK1
Production of Nitric Oxide and Reactive Oxygen Species in Macrophages	2.31	0.0302	TLR4,APOE,AKT1,KL,CREBBP,NOS2
MIF Regulation of Innate Immunity	2.31	0.0682	TLR4,PLA2G6,NOS2
ERK/MAPK Signaling	2.27	0.0296	FYN,PLA2G6,KL,CREBBP,PRKAR1B,ELK1
Hereditary Breast Cancer Signaling	2.25	0.0347	HDAC6,AKT1,HDAC3,KL,CREBBP
Ovarian Cancer Signaling	2.23	0.0342	AKT1,WNT7A,KL,PRKAR1B,WNT2
iNOS Signaling	2.23	0.0638	TLR4,CREBBP,NOS2
Insulin Receptor Signaling	2.21	0.034	FYN,AKT1,KL,FOXO3,PRKAR1B
Estrogen Biosynthesis	2.2	0.0625	CYP1A2,CYP2D6,CYP2C19
G Beta Gamma Signaling	2.13	0.0408	AKT1,PRKAR1B,KCNJ6,CAV3
CTLA4 Signaling in Cytotoxic T Lymphocytes	2.11	0.0404	FYN,AKT1,KL,AP1G1
nNOS Signaling in Neurons	2.1	0.0577	NOS1AP,GRIN2D,DLG4
Relaxin Signaling	2.06	0.0312	AKT1,KL,PRKAR1B,NOS2,ELK1
Chronic Myeloid Leukemia Signaling	2.04	0.0385	HDAC6,AKT1,HDAC3,KL
